# Supplementary material for: Impact of κ-Carrageenan on the Cold-Set Pea Protein Isolate Emulsion-Filled Gels: Mechanical Property, Microstructure, and In Vitro Digestive Behavior
Source: MDPI journal article supplement (doi:10.3390/foods13030483), 2024-02-02
Supplement: s1 [file s1]

## **Supplementary Data**

### **Impact of $\kappa$ -carrageenan on the cold-set pea protein isolate emulsion-filled gels: Mechanical property, microstructure, and *in vitro* digestive behavior**

Xiaojiao Li<sup>1,2</sup>, Xing Chen<sup>1,2\*\*</sup>, Hao Cheng<sup>1,2\*</sup>

<sup>1</sup>State Key Laboratory of Food Science and Resources, Jiangnan University, Wuxi, Jiangsu, China

<sup>2</sup>School of Food Science and Technology, Jiangnan University, Wuxi, Jiangsu, China

**\*Corresponding author 1: Hao Cheng**

Address: State Key Laboratory of Food Science and Resources, School of Food Science and Technology, Jiangnan University, Wuxi, Jiangsu 214122, China.

Telephone: +86(510)8519-7367;

Email: haocheng@jiangnan.edu.cn

**\*\*Corresponding author 2: Xing Chen**

Address: State Key Laboratory of Food Science and Resources, School of Food Science and Technology, Jiangnan University, Wuxi, Jiangsu 214122, China.

Telephone: +86(510)8519-7367;

Email: xingchen@jiangnan.edu.cn

**Figure S1**

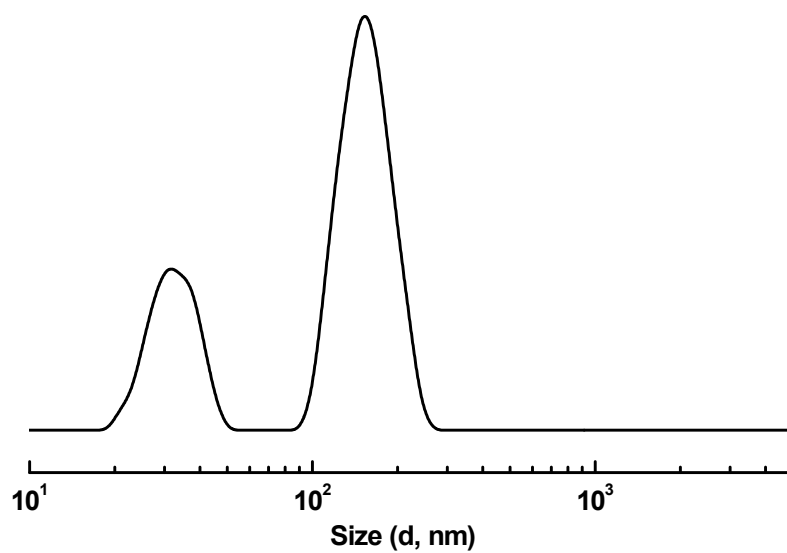

**Fig. S1** Size distribution of pea protein isolate aggregates.
